# Supplementary material
Source: Springer Nature journal article supplement (https://www.springermedizin.de/resource/supplementary/12947_2009_258_MOESM1_ESM.pdf/9556558)

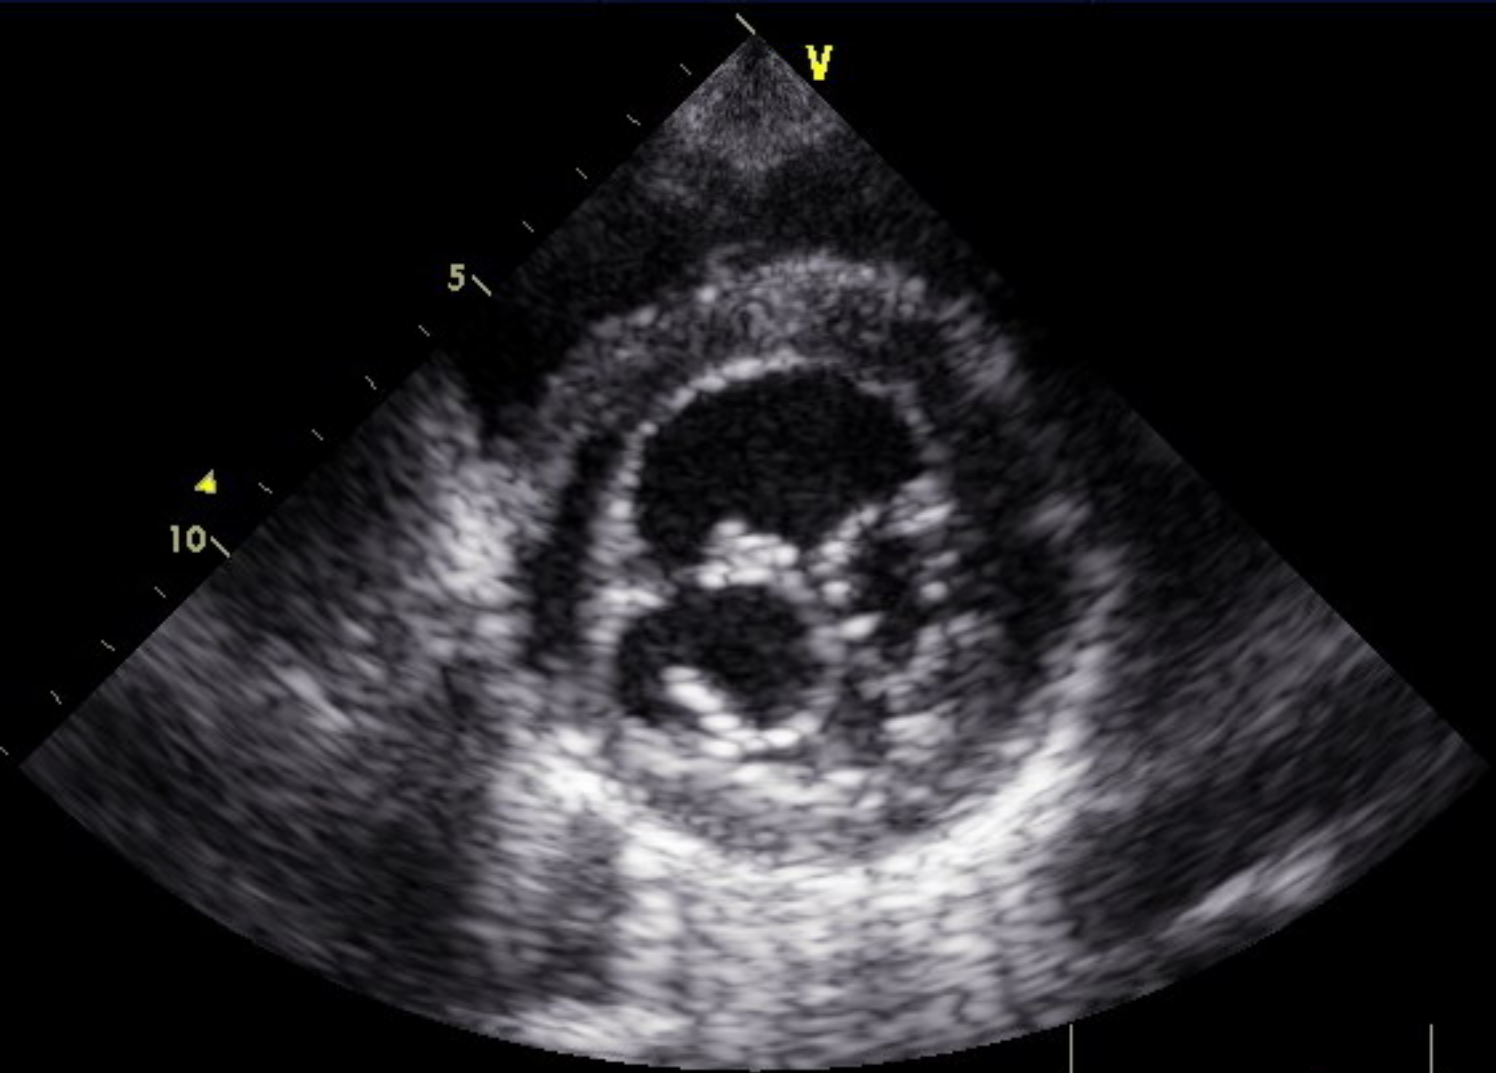

Supplement: MOESM1 [file 9556558]
